# Supplementary material
Source: PubMed Central journal article supplement (PMC3217264)

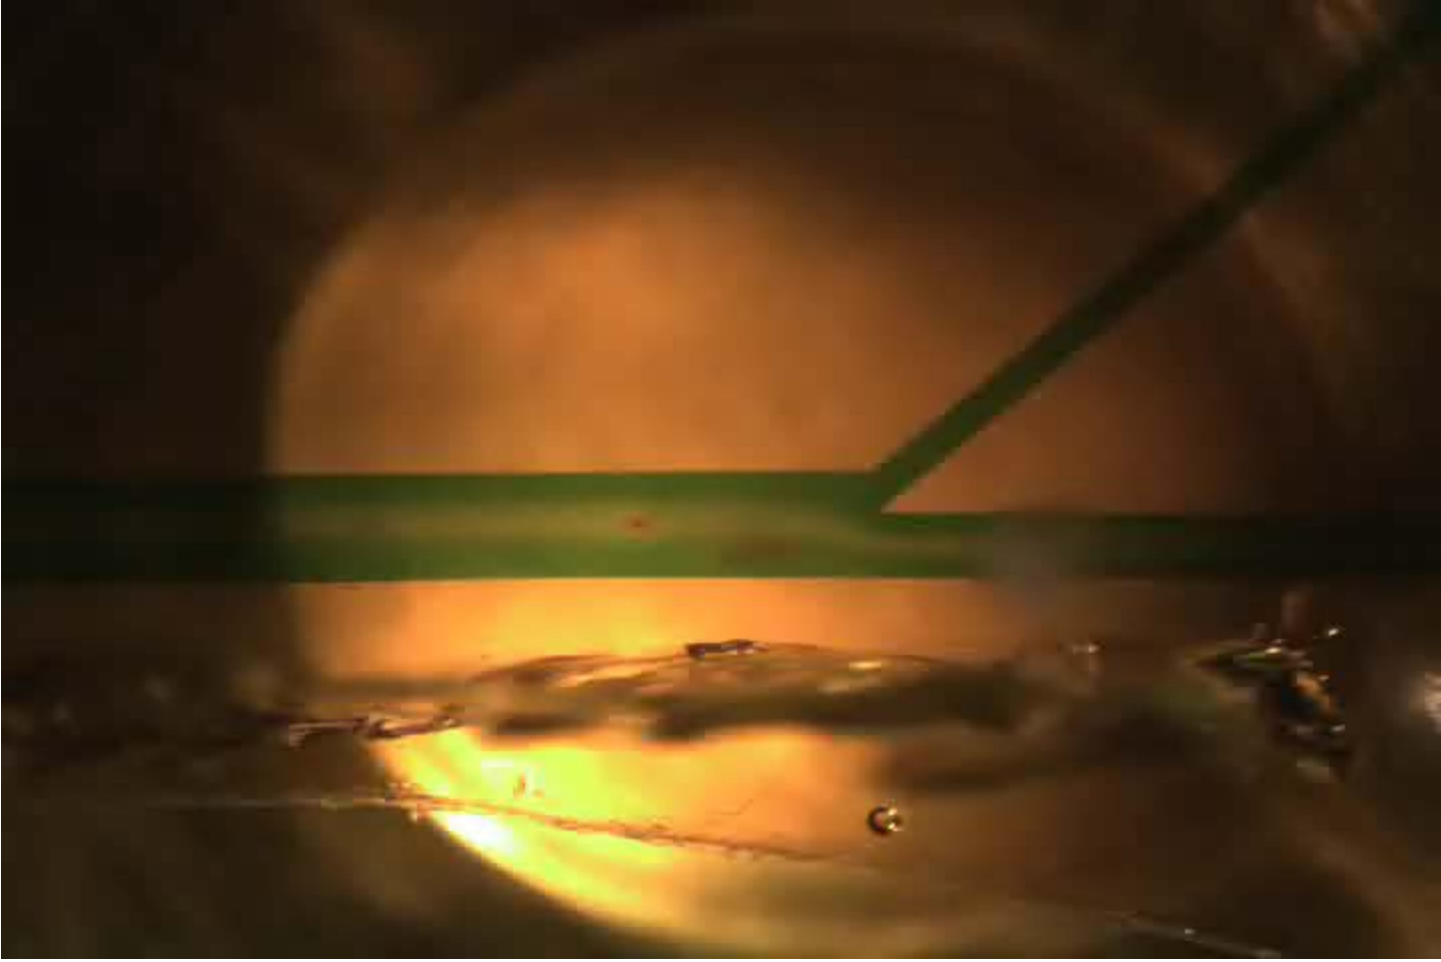

Supplement: NIHMS323616-supplement-cell_sorting.pdf [file NIHMS323616-supplement-cell_sorting.pdf]
